# Supplementary material for: Ultrasensitive pathogen detection with a rolling circle amplification-empowered multiplex electrochemical DNA sensor
Source: Royal Society of Chemistry journal article supplement (doi:10.1039/d1cc05181d), 2021-01-01
Supplement: d1cc05181d1.pdf [file d1cc05181d1.pdf]

## *Supplementary Information*

# **Ultrasensitive pathogen detection with a rolling circle amplification-empowered multiplex electrochemical DNA sensor**

Cheryl S.Y. Yeap,<sup>abg</sup> Thanyarat Chaibun,<sup>ag</sup> Lee Su Yin,<sup>c</sup> Bin Zhao,<sup>de</sup> Yuan Jan,<sup>df</sup> Chan La-ovorakiat,<sup>g</sup> Werasak Surareungchai,<sup>gh</sup> Shiping Song,<sup>d</sup> and Benchaporn Lertanantawong<sup>\*ag</sup>

<sup>a</sup>. Biosensors laboratory, Department of Engineering, Faculty of Biomedical Engineering, Mahidol University, Nakhon Pathom, Thailand.

<sup>b</sup>. Institute for Nanomaterials Advanced Technologies and Innovation, Technical University of Liberec, Bendlova 1409/7, 46117 Liberec 1, Czech Republic.

<sup>c</sup>. Department of Biotechnology, Faculty of Applied Sciences, AIMST University, Kedah, 08100, Malaysia.

<sup>d</sup>. Division of Physical Biology & Bioimaging Center, Shanghai Synchrotron Radiation Facility, CAS Key Laboratory of Interfacial Physics and Technology, Shanghai Institute of Applied Physics, Chinese Academy of Sciences, Shanghai, China.

<sup>e</sup>. Carl R. Woese Institute for Genomic Biology, University of Illinois at Urbana–Champaign, Urbana, IL, 61801, USA.

<sup>f</sup>. College of Food Science and Technology, Shanghai Ocean University, Shanghai 201306, China

<sup>g</sup>. Pilot Plant and Development Training Institute, Nanoscience and Nanotechnology Research Cluster, King Mongkut's University of Technology Thonburi (KMUTT), Bang Khun Thian Campus, Bangkok, 10150, Thailand.

<sup>h</sup>. School of Bioresources & Technology, King Mongkut's University of Technology Thonburi, Thailand.

**Table S1. The oligonucleotide sequences of circular DNA, primers and probes used in this study.**

| Name                             | Sequence (5'→3')                                                     | Length (bases) |
|----------------------------------|----------------------------------------------------------------------|----------------|
| <b><i>Salmonella typhi</i></b>   |                                                                      |                |
| Capture probe (CP-ST)            | Biotin-CGTTAACCCAGTCACAGC                                            | 18             |
| Circular DNA (CDNA-ST)           | TAAC TTGTTCTTGATGTGCTGTGACTGGGTAAAC<br>GGCTAACTCCAGGAACGACTTTGTATCCA | 64             |
| Linear target (LT-ST)            | TGGAGGAACAAGTTATGGATACAAA                                            | 25             |
| Reporter probe (RP-ST)           | Biotin-GCTAACTCCAGGAACGAC                                            | 18             |
| <b><i>Shigella flexneri</i></b>  |                                                                      |                |
| Capture probe (CP-SF)            | Biotin-CGTAAACTGGCGCTCTCA                                            | 18             |
| Circular DNA (CDNA-SF)           | AAAGGAAACCTTGATGTCTGAGAGCGCCAGTTTA<br>CGAGACGGCAACCTGGTATTCCCAAATCGT | 64             |
| Linear target (LT -SF)           | GCTACGGTTTCCTTTACGATTTGGG                                            | 25             |
| Reporter probe (RP-SF)           | Biotin-AGACGGCAACCTGGTATT                                            | 18             |
| <b><i>Vibrio cholerae</i></b>    |                                                                      |                |
| Capture probe (CP-VC)            | Biotin-CTCTCGATCGATGACTGA                                            | 18             |
| Circular DNA (CDNA-VC)           | GGAGTTAATATTGATGTCTCAGTCATCGATCGAG<br>AGCGCTTCGTAAGGATCCAGCACAAGTATA | 64             |
| Linear target (LT -VC)           | CTTTTTATTA ACTCCTATACTTGTG                                           | 25             |
| Reporter probe (RP-VC)           | Biotin-CGCTTCGTAAGGATCCAG                                            | 18             |
| Non-complementary target (NC-LT) | GTCACCCCAGAAACCACCGCCGG                                              | 23             |
| Blocking probe (BP)              | Biotin-AAAAAAAAAA                                                    | 10             |

### **Preparation of silica microsphere with redox dye**

One hundred  $\mu\text{L}$  of TEOS was added to 5 mL of 95% ethanol in an Erlenmeyer flask while cooling at 0 °C in an ice-cooled ultra-sonicating water bath. After that, 5 mL of ammonium hydroxide (28-30 %) was added to the solution during the sonication for 1 hour. This will produce the pure silica nanoparticles, which were then collected by centrifugation at 8,000 rpm for 10 min. The silica pellet was redispersed with water and acetone. The centrifugation and redispersion steps were repeated up to 6 times. The silica core particles were collected, air-dried and kept at room temperature until further use. The dye was incorporated within the cavities of the silica outer layer, 0.3 g of silica core were dissolved in 10.9 mL of 2-propanol containing 15  $\mu\text{mol}$  of dye in an ultrasonic bath. Then, 0.55 mL of TEOS was added into solution followed by 1.5 mL of 25% ammonia solution, which was diluted with 12 mL of milli-Q water. The solution was mixed at 40 °C for 2 h until it formed a colloidal suspension. Finally, the resulting silica-redox dye particles were separated by centrifugation at 10,000 rpm for 5 min, washed 5x with milli-Q water and dried in a desiccator overnight. This method was used to produce silica microspheres incorporated with either MB, AO or  $\text{Ru}(\text{bpy})_3^{2+}$ . The silica microspheres and silica-redox dye particles were characterized by scanning electron microscopy, SEM (JSM-6610LV, JEOL Ltd., Tokyo, Japan).

### **Conjugation of reporter probes to the silica-redox dye microspheres**

Silica-redox dye particles (0.010 g) was sonicated in 1 mL of milli-Q water until a homogenous suspension. The silica-redox dye solution was mixed with 0.2 mL of PAA and PSS solution (10 mg  $\text{mL}^{-1}$  in 0.5 M NaCl). Each polyelectrolyte was allowed to adsorb for 30 min at room temperature, and three centrifugation/ redispersions steps were performed to remove excess polyelectrolyte and resuspended in 1 mL of 10 mM PB, pH 7.4. Then 10  $\mu\text{L}$  of avidin (21.14 mg/mL) was added and incubated for 90 min with agitation at 37 °C. After that excess avidin was removed by 3 centrifugation/redispersion steps. Next, 300  $\mu\text{L}$  of 5 mg/mL of avidin/silica-dye, 99  $\mu\text{L}$  of 10  $\mu\text{M}$  of blocking probe, 1  $\mu\text{L}$  of 10  $\mu\text{M}$  reporter probe were added to 100  $\mu\text{L}$  of 0.1 M PBS and mixed well. The mixture was incubated for 30 min at room temperature with agitation. The DNA/silica-dye labels were then collected by three centrifugation/redispersion

steps. The resulting reporter probe/silica-dye label for each target were: *Salmonella typhi* (ST-RP/silica-MB), *Shigella flexneri* (SF-RP/silica-AO) and *Vibrio cholerae* (VC-RP/Ru(bpy)<sub>3</sub><sup>2+</sup>). For multiplex detection, the 3-reporter probe/silica-dye labels were mixed in equimolar concentrations and added to the hybridization reaction.

#### **Attachment of biotinylated capture probes to magnetic beads**

One hundred  $\mu\text{L}$  of Dynabeads™ MyOne™ Streptavidin T1 (10  $\mu\text{g}/\mu\text{L}$ ) was washed 3x with 20 mM PBS containing 0.05% Tween 20, pH 7.4. The magnetic bead pellet was redispersed in 184  $\mu\text{L}$  of 20 mM PBS, pH 7.4. Then, 4  $\mu\text{L}$  of 100  $\mu\text{M}$  biotinylated capture probe and 12  $\mu\text{L}$  of 100  $\mu\text{M}$  blocking probe were added and incubated at room temperature for 40 min with agitation. At the end of incubation, the magnetic beads with capture probe (MGB-CP) were washed 3x, and finally dispersed in 100  $\mu\text{L}$  of 20 mM PBS, pH 7.4.

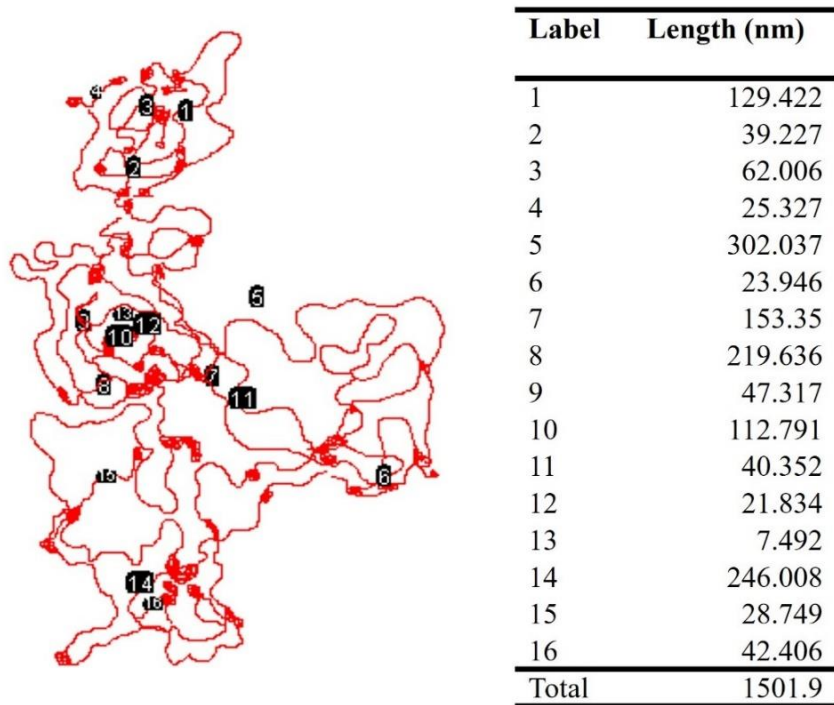

**Fig. S1.** The free hand schematic drawing of the 16 hours amplified RCA amplicon and estimation of its length as measured by ImageJ 1.52i (Fiji) software. The RCA amplicon was divided into 16 segments (red line drawing on the left) and the length of each segment was estimated and summed up (right table). The total length of the 16 hr RCA amplicon was approximately 1500 nm.

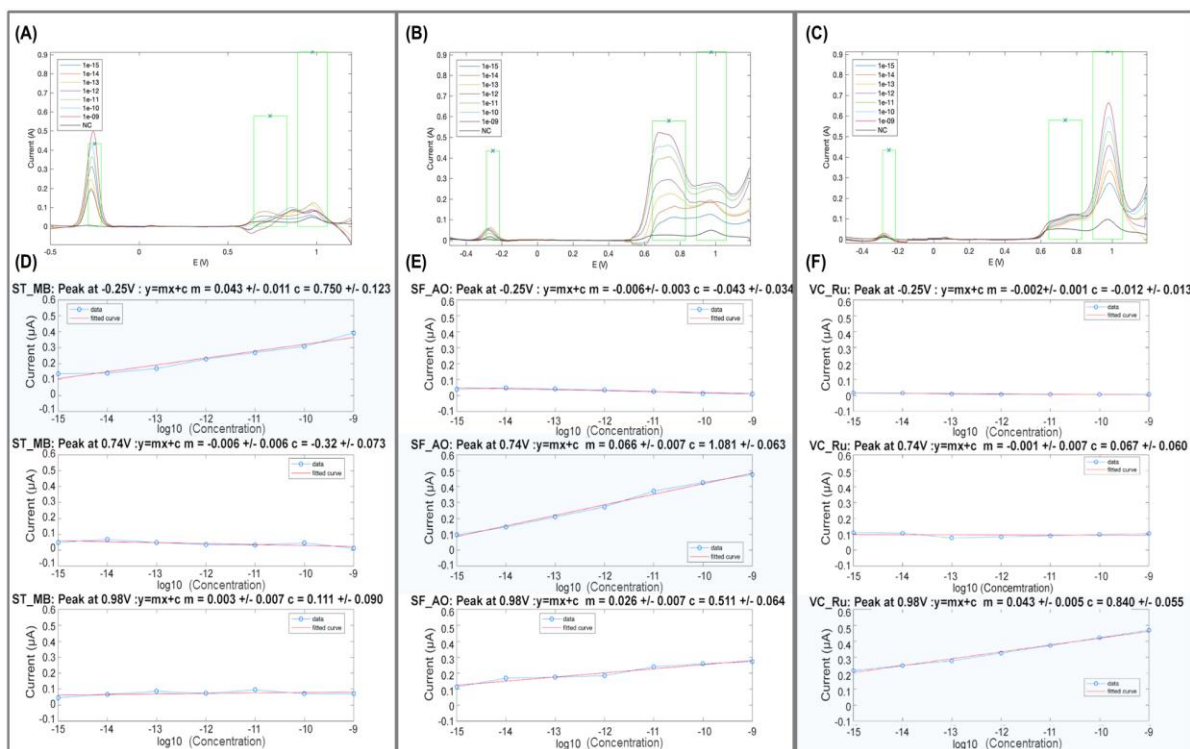

**Fig. S2.** Sensitivity of the monoplex RCA assay using different concentrations (1 fM to 1 nM) of linear target. In the DPV voltammograms (A, B, C), the peak current responses were observed at -0.25 V for *S. typhi* (A), +0.74 V for *S. flexneri* (B) and +0.98 V for *V. cholerae* (C), respectively. Calibration curves of the monoplex RCA assay with *S. typhi* (D), *S. flexneri* (E) and *V. cholerae* (F) linear targets show a positive correlation in the current response to increasing concentration of linear target, only at their corresponding peak potential, and not at the other two non-corresponding peak potentials.

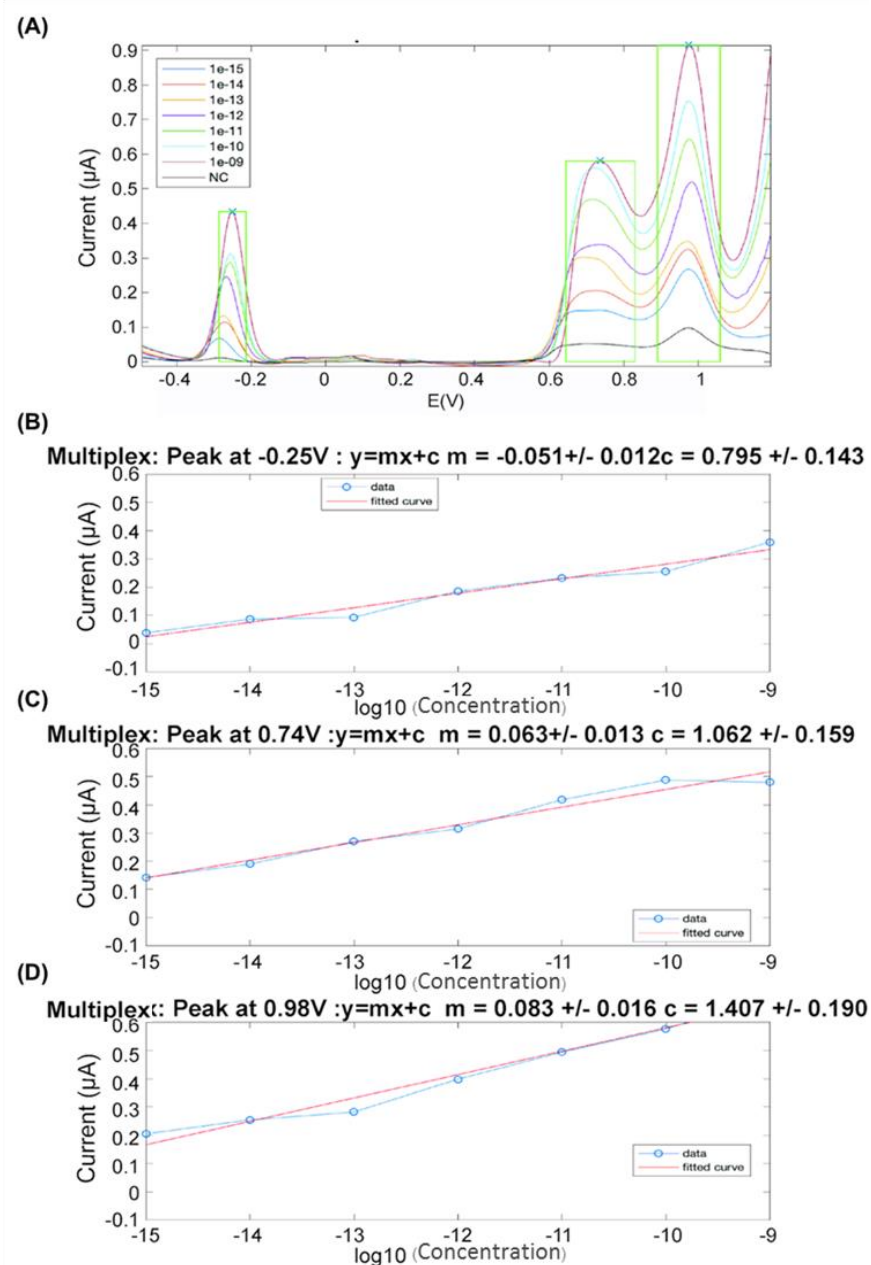

**Fig. S3.** Sensitivity of the multiplex RCA assay using different concentrations (1 fM to 1 nM) of each linear target. (A) In the DPV voltammogram, the peak current responses were observed at -0.25 V for *S. typhi*, +0.74 V for *S. flexneri* and +0.98 V for *V. cholerae*, respectively. Calibration curve of the multiplex RCA assay with *S. typhi* (B), *S. flexneri* (C) and *V. cholerae* (D) linear targets show a positive correlation in the current response to increasing concentration of linear targets.
